# Supplementary material
Source: publisher figshare collection journal article supplement (https://acs.figshare.com/ndownloader/files/4129882)
Supplement: Supplementary file 1 [file 4129882]

## Supporting Information

# First Synthesis of EuS Nanoparticle Thin Films with Wide Energy Gap and Giant Opto-magnetic Efficiency on the Glass Electrode

*Yasuchika Hasegawa,<sup>†\*</sup> Mina Kumagai,<sup>†</sup> Akira Kawashima,<sup>†</sup> Takayuki Nakanishi,<sup>†</sup>*

*Koji Fujita,<sup>‡</sup> Katsuhisa Tanaka,<sup>‡</sup> and Koji Fushimi<sup>†\*</sup>*

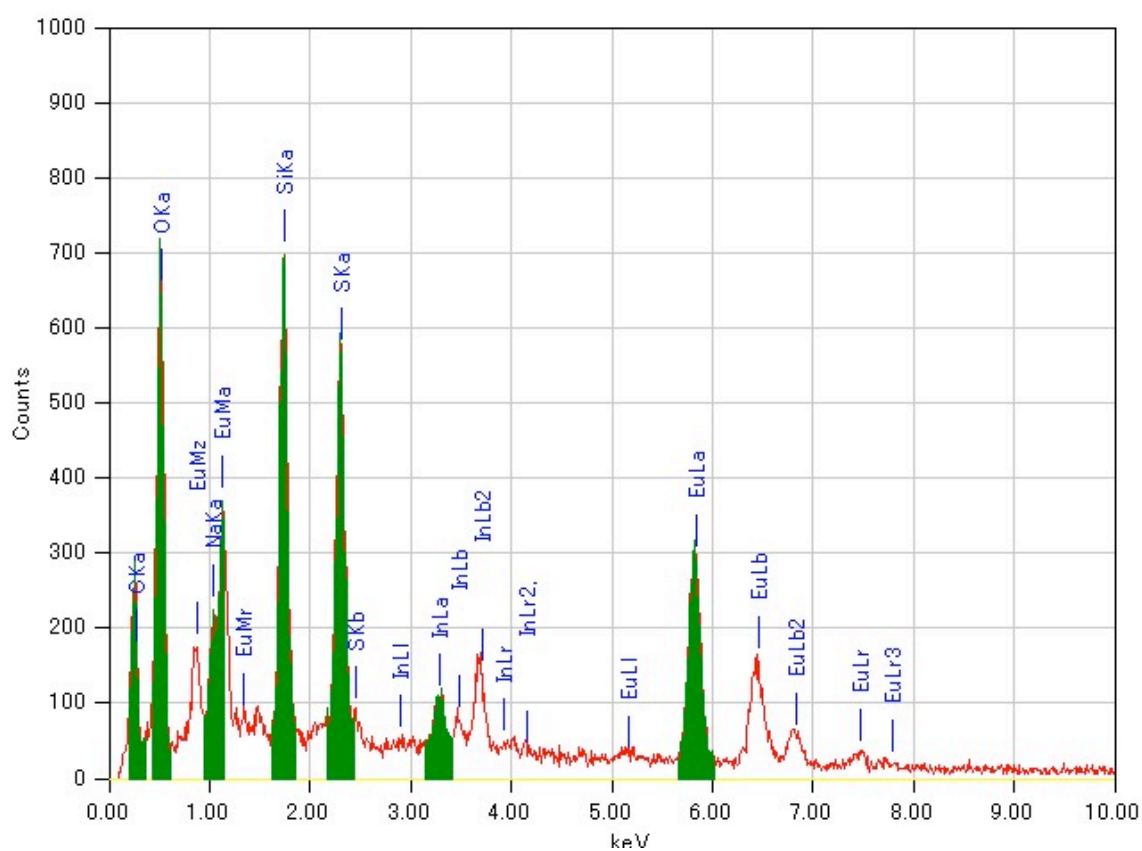

Figure S1 EDX analysis of EuS nanoparticle thin film by electro-chemical deposition of Eu(III) dithiocarbamate complex potentiostatic polarization at -1.3 V (SCE). EDX analysis was performed with a SEM measurement.

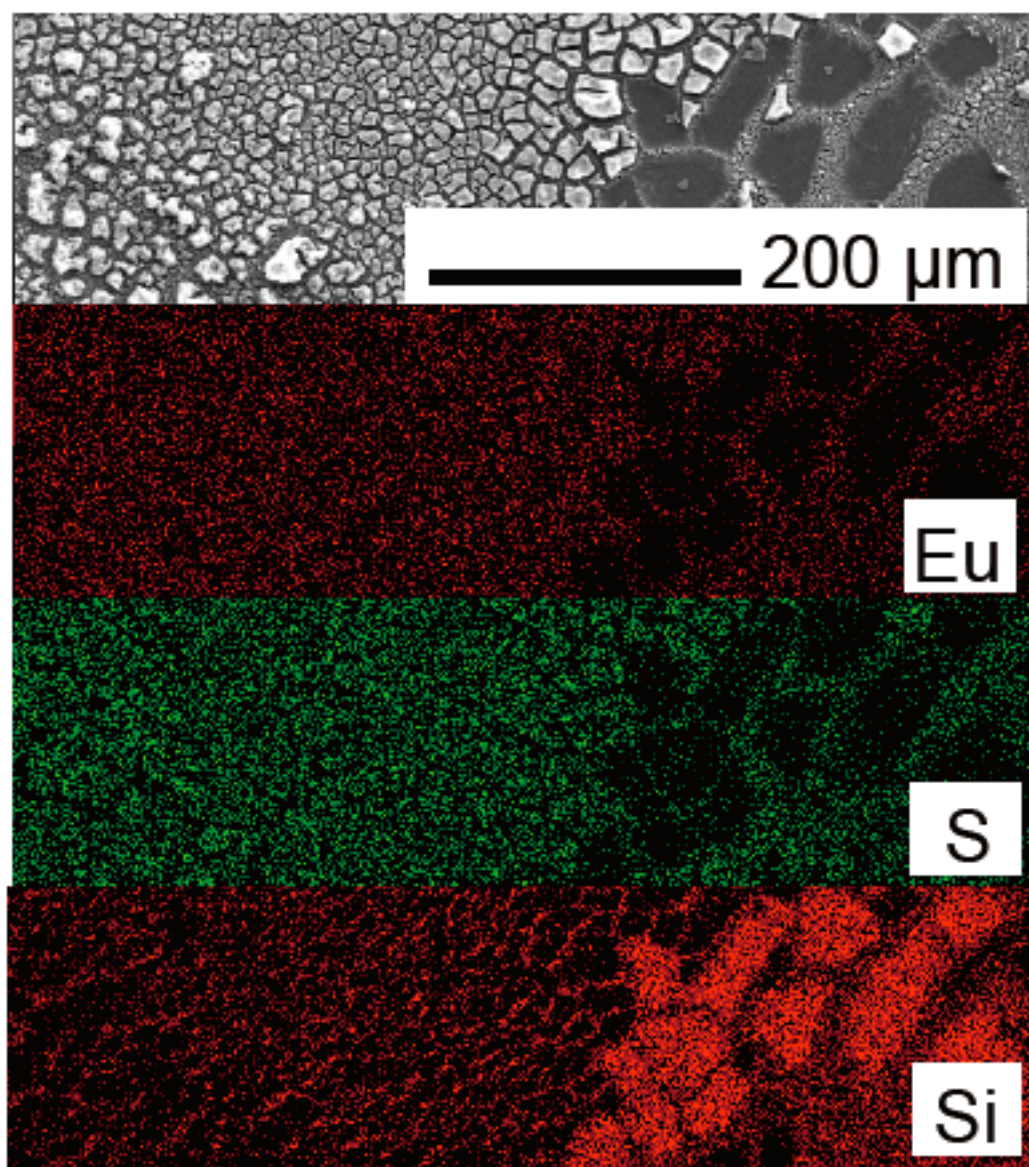

Figure S2 EDX mapping image of EuS nanoparticle thin film by electro-chemical deposition of Eu(III) dithiocarbamate complex potentiostatic polarization at -1.3 V (SCE). EDX analysis was performed with a SEM measurement. Cracks on the EuS thin film surface is due to dry process for SEM measurements. Si element is assigned to SiO<sub>2</sub> glass substrate as an electrode.

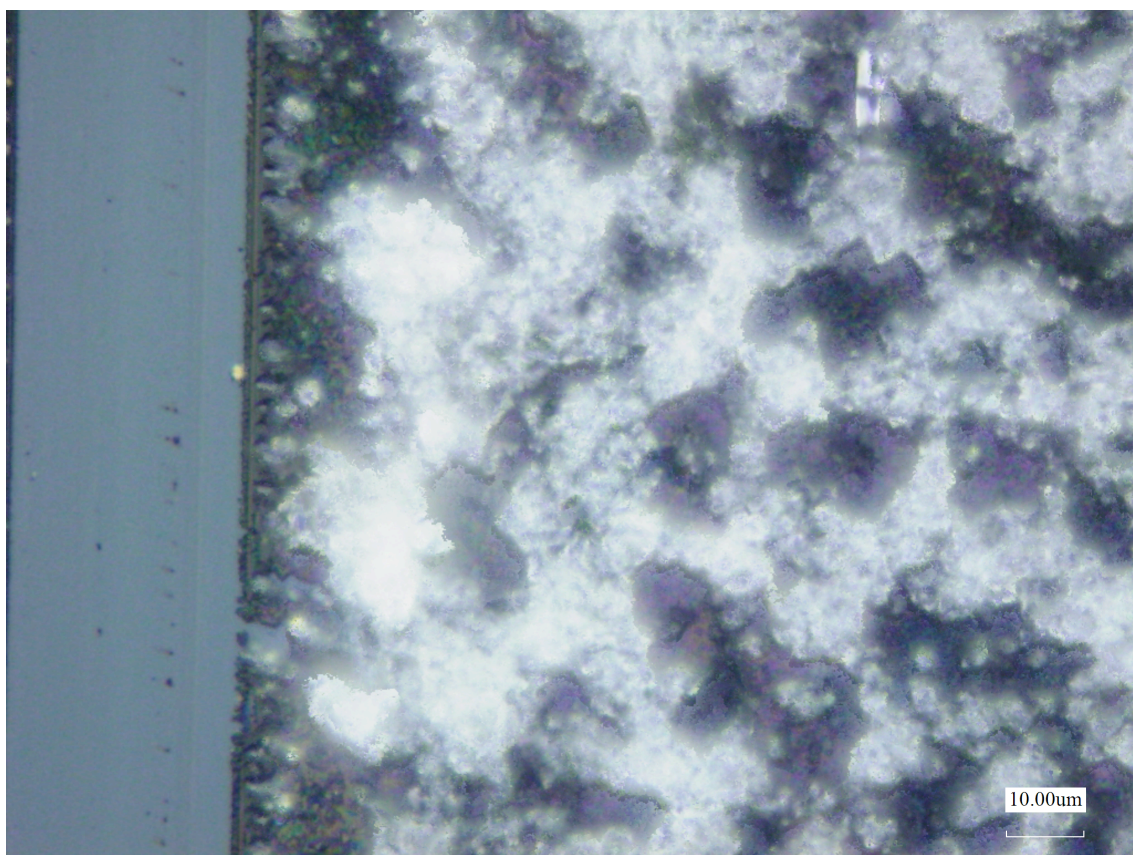

Figure S3 Laser scanning microscope images of a EuS amorphous thin film before heat-treatment at 300 °C.



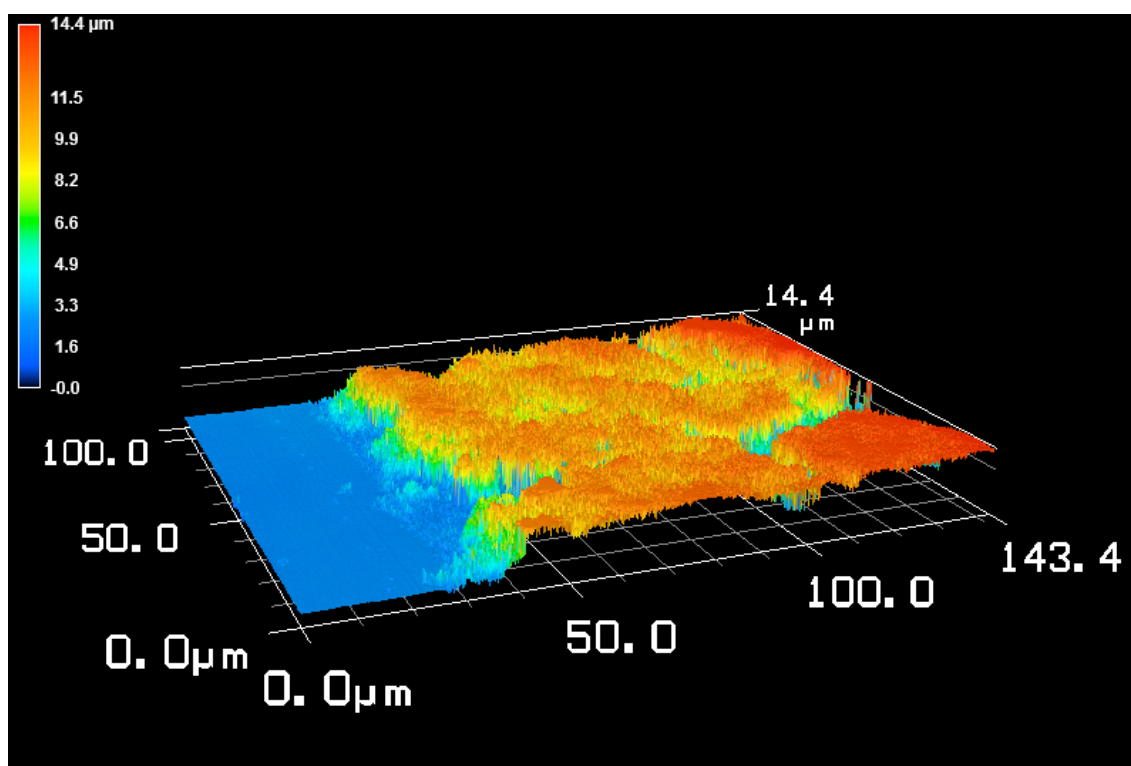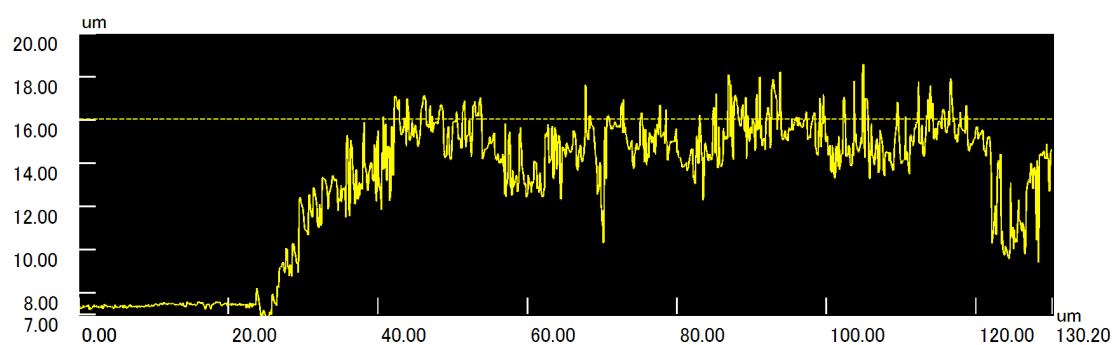

Figure S4 Three dimensional images of a EuS amorphous thin film before heat-treatment at 300 °C using laser scanning microscope.

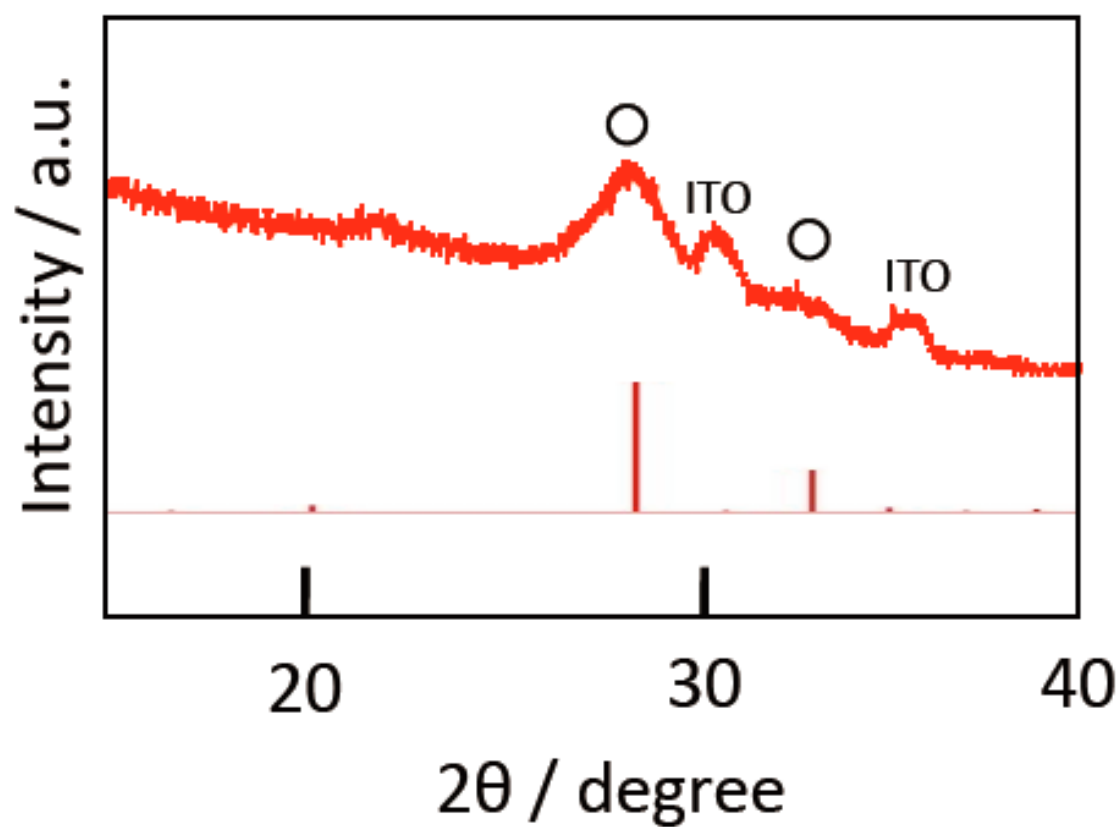

Figure S5 XRD profile of a thin film after heat-treatment at 400 °C.
